# Supplementary material for: Spontaneous self-healing ionogels for efficient and reliable carbon dioxide separation
Source: Royal Society of Chemistry journal article supplement (doi:10.1039/d1ta08915c), 2022-01-01
Supplement: d1ta08915c1.pdf [file d1ta08915c1.pdf]

---Supporting Information---

# Spontaneous Self-Healing Ionogels for Efficient and Reliable Carbon Dioxide Separation

Yonghao Fu,<sup>a</sup> Liyuan Chen,<sup>b</sup> Fuchang Xu,<sup>a</sup> Xiang Li,<sup>a</sup> Yang Li<sup>\*a</sup> and Junqi Sun<sup>a</sup>

<sup>a</sup> State Key Laboratory of Supramolecular Structure and Materials, College of Chemistry, Jilin University, Changchun 130012, People's Republic of China.

<sup>b</sup> Key Laboratory of High Performance Plastics, Ministry of Education, College of Chemistry, Jilin University, Changchun 130012, People's Republic of China.

\*E-mail: yanglichem@jlu.edu.cn.

**Table S1.** Summary of the formula for the preparation of samples used in this work

| Sample name                            | H <sub>2</sub> N-PPG-<br>PEG-PPG-<br>NH <sub>2</sub> (g) | BTC (g) | Molar ratio of CHO/NH <sub>2</sub> | [EMIm]TFSI<br>(g) |
|----------------------------------------|----------------------------------------------------------|---------|------------------------------------|-------------------|
| I-SPN <sub>90</sub> /IL <sub>60</sub>  | 1.50                                                     | 0.07680 | 90: 100                            | 2.25              |
| I-SPN <sub>95</sub> /IL <sub>60</sub>  | 1.50                                                     | 0.08107 | 95: 100                            | 2.25              |
| I-SPN <sub>100</sub> /IL <sub>60</sub> | 1.50                                                     | 0.08533 | 100: 100                           | 2.25              |
| I-SPN <sub>105</sub> /IL <sub>60</sub> | 1.50                                                     | 0.08960 | 105: 100                           | 2.25              |
| I-SPN <sub>110</sub> /IL <sub>60</sub> | 1.50                                                     | 0.09387 | 110: 100                           | 2.25              |
| I-SPN <sub>95</sub> /IL <sub>50</sub>  | 1.50                                                     | 0.08107 | 95: 100                            | 1.50              |
| I-SPN <sub>95</sub> /IL <sub>70</sub>  | 1.50                                                     | 0.08107 | 95: 100                            | 3.50              |
| I-SPN <sub>95</sub> /IL <sub>0</sub>   | 3.00                                                     | 0.16214 | 95: 100                            | 0                 |

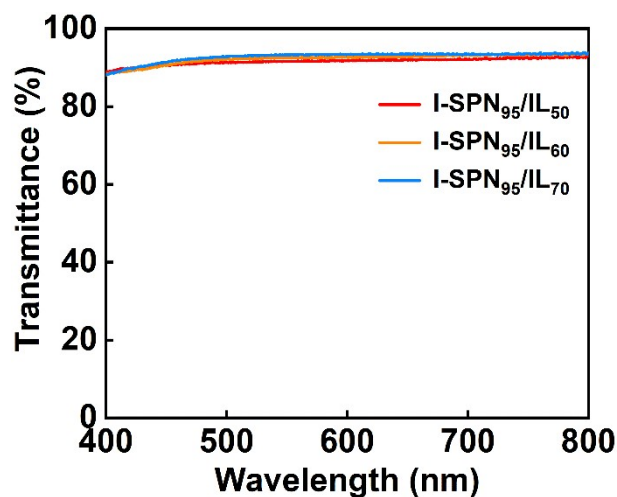

**Fig. S1** UV-vis spectra of the I-SPN<sub>95</sub>/IL<sub>50</sub>, I-SPN<sub>95</sub>/IL<sub>60</sub>, and I-SPN<sub>95</sub>/IL<sub>70</sub> ionogels.

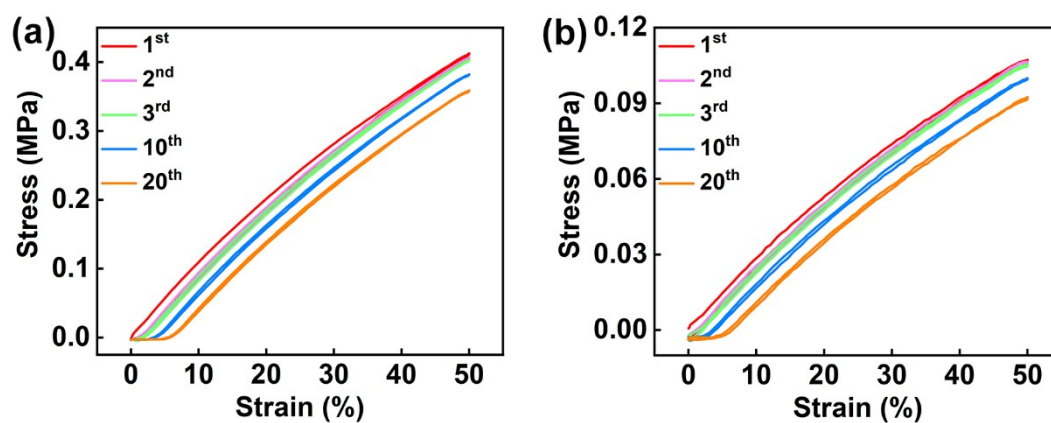

**Fig. S2** Continuous cyclic stress-strain curves of the (a) I-SPN<sub>95</sub>/IL<sub>50</sub> and (b) I-SPN<sub>95</sub>/IL<sub>70</sub> ionogels.

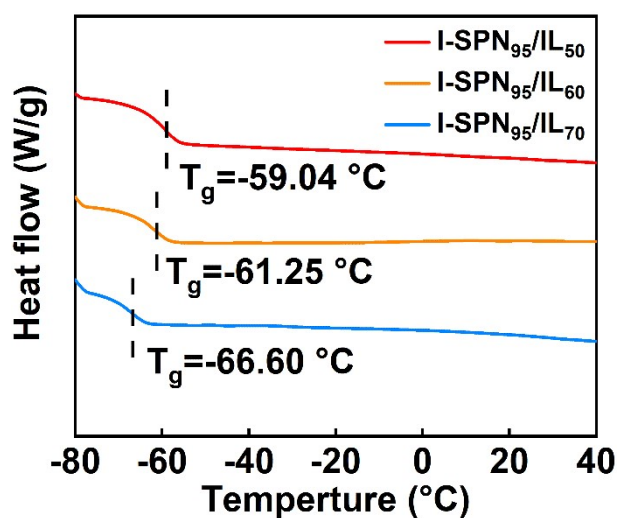

**Fig. S3** DSC curves of the I-SPN<sub>95</sub>/IL<sub>50</sub>, I-SPN<sub>95</sub>/IL<sub>60</sub>, and I-SPN<sub>95</sub>/IL<sub>70</sub> ionogels.

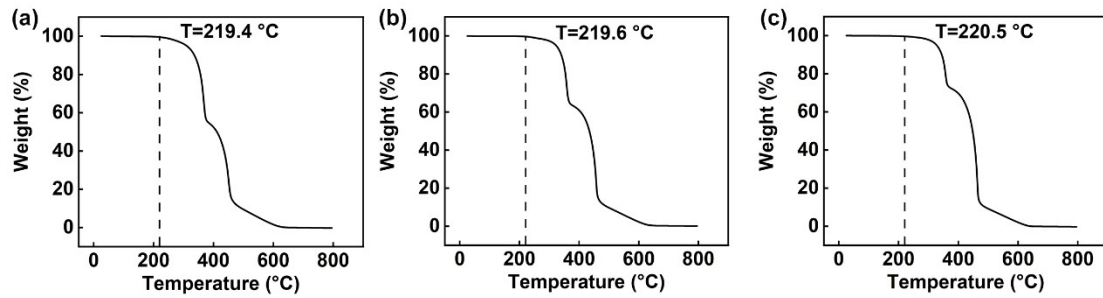

**Fig. S4** TGA curves of (a) I-SPN<sub>95</sub>/IL<sub>50</sub>, (b) I-SPN<sub>95</sub>/IL<sub>60</sub>, and (c) I-SPN<sub>95</sub>/IL<sub>70</sub> ionogels.

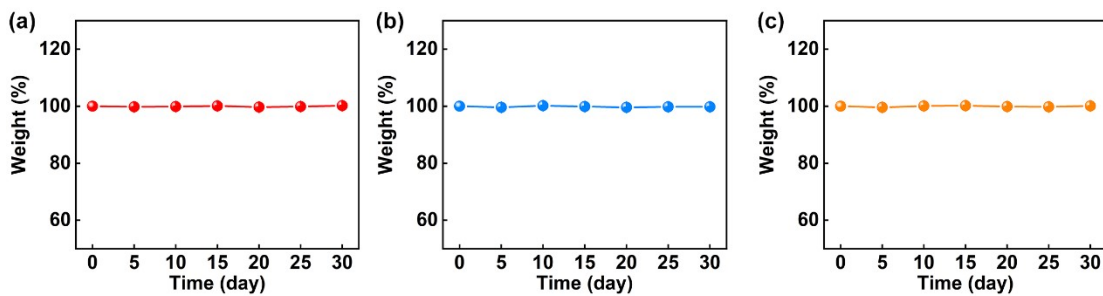

**Fig. S5** The weight changes of (a) I-SPN<sub>95</sub>/IL<sub>50</sub>, (b) I-SPN<sub>95</sub>/IL<sub>60</sub>, and (c) I-SPN<sub>95</sub>/IL<sub>70</sub> ionogels in a vacuum environment over time.

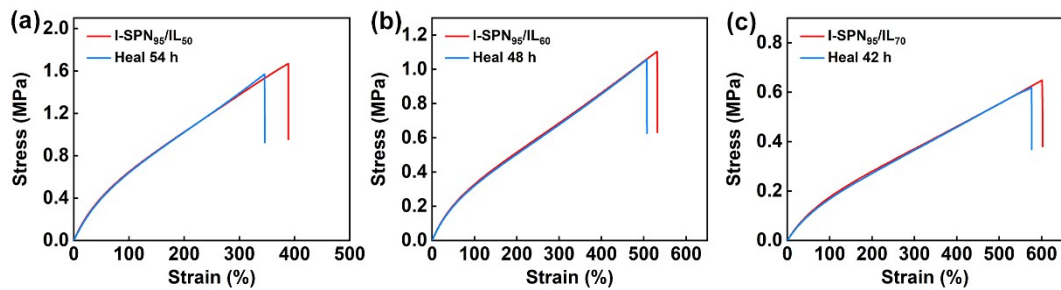

**Fig. S6** Stress-strain curves of pristine and healed (a) I-SPN<sub>95</sub>/IL<sub>50</sub>, (b) I-SPN<sub>95</sub>/IL<sub>60</sub>, and (c) I-SPN<sub>95</sub>/IL<sub>70</sub> ionogels.

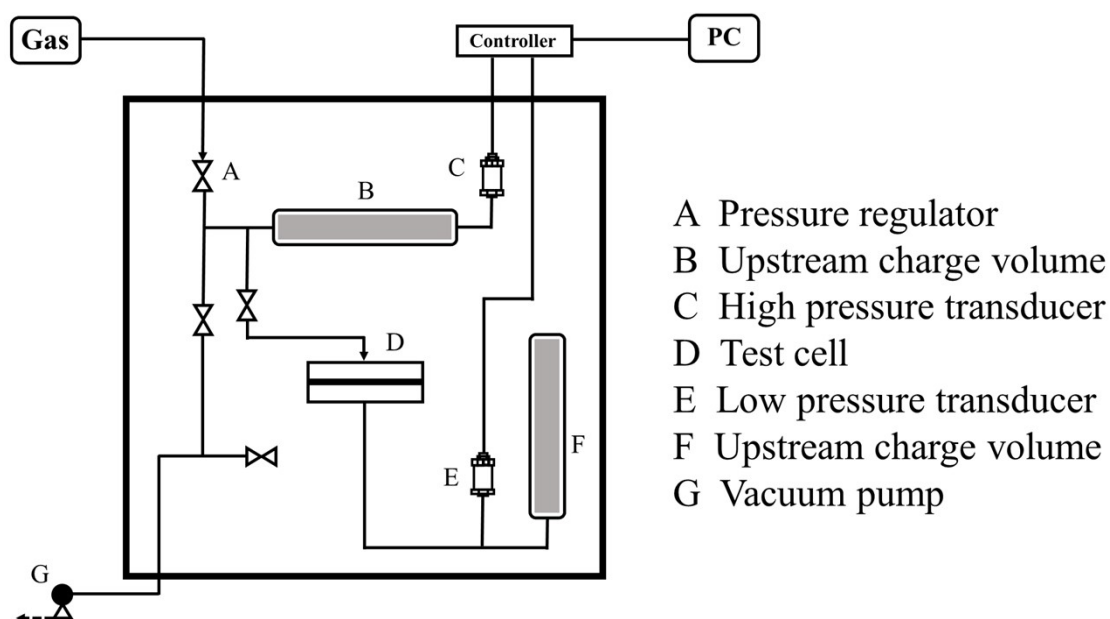

**Fig. S7** Schematic of the homemade gas permeation testing equipment.

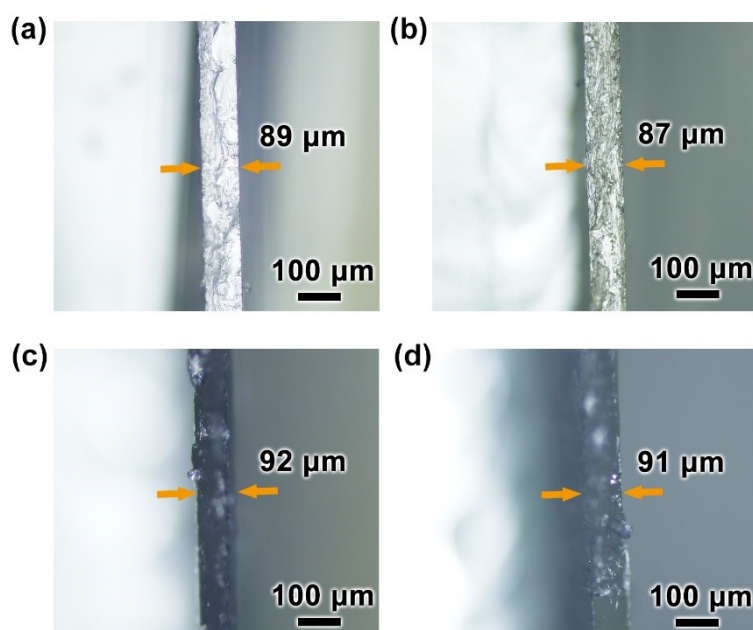

**Fig. S8** Cross-sectional microscope images of the (a) I-SPN<sub>95</sub>/IL<sub>0</sub>, (b) I-SPN<sub>95</sub>/IL<sub>50</sub>, (c) I-SPN<sub>95</sub>/IL<sub>60</sub>, and (d) I-SPN<sub>95</sub>/IL<sub>70</sub> ionogels.

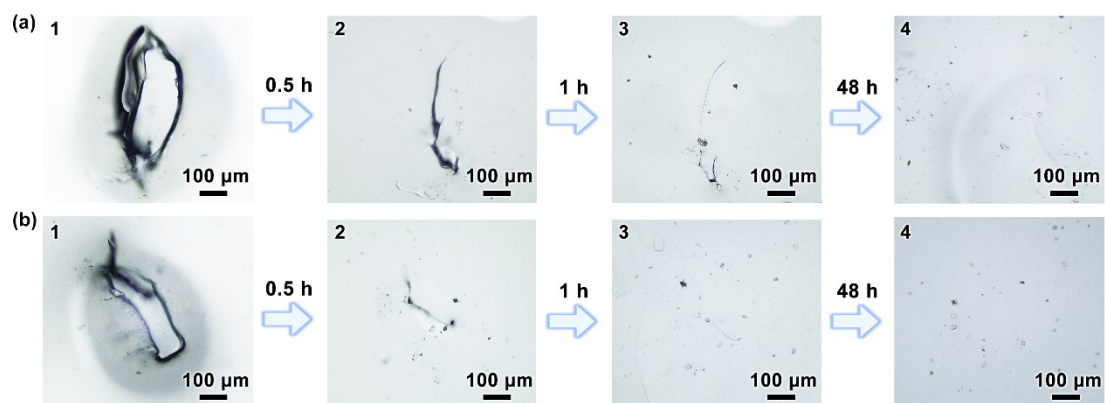

**Fig. S9** Microscope images of the pierced (a) I-SPN<sub>95</sub>/IL<sub>50</sub> and (b) I-SPN<sub>95</sub>/IL<sub>60</sub> ionogels (1) before and after healing for (2) 0.5 h, (3) 1 h, and (4) 48 h.
